# Supplementary material for: The LEDGF/p75 Integrase Binding Domain Interactome Contributes to the Survival, Clonogenicity, and Tumorsphere Formation of Docetaxel-Resistant Prostate Cancer Cells
Source: MDPI journal article supplement (doi:10.3390/cells10102723), 2021-10-12

Supplementary  
Fig. S1

**A**

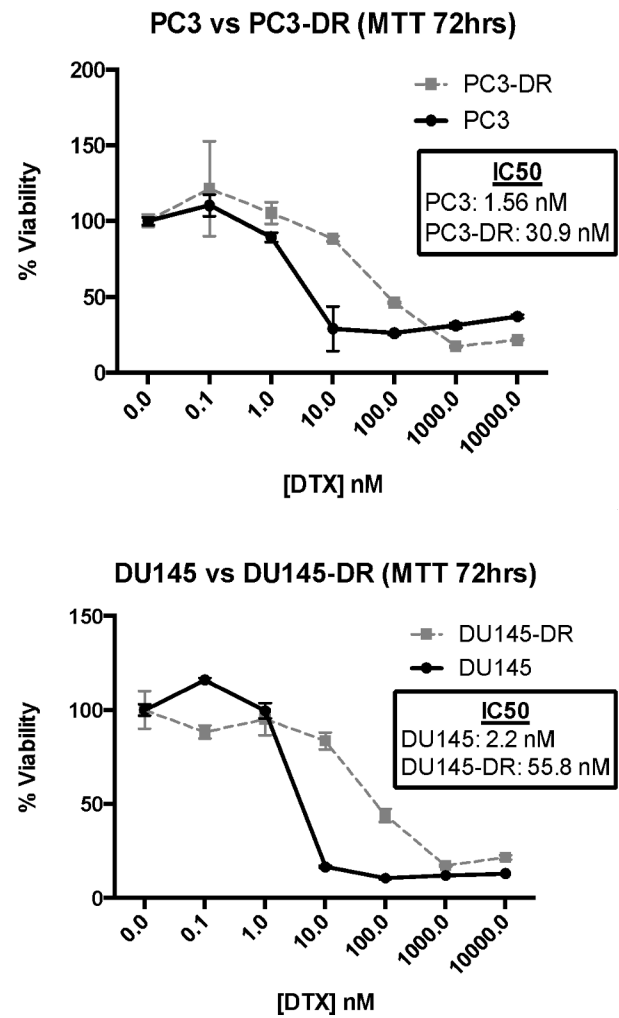

**B**

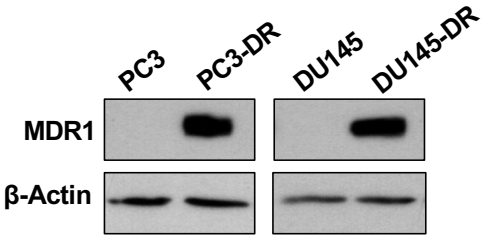

**C**

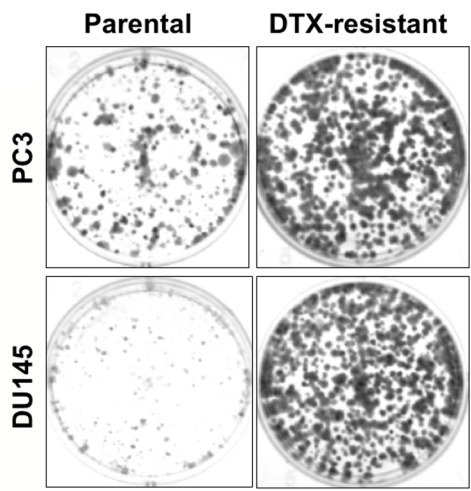

**Supplementary Table S1. List of canonical pathways revealed by Ingenuity Pathway Analysis of the LEDGF/p75 interactome in PC3 cells**

| Canonical Pathways                                                 | Associated signaling molecules |                                                                                                                                                                                                                         | Upstream regulators | p-values |
|--------------------------------------------------------------------|--------------------------------|-------------------------------------------------------------------------------------------------------------------------------------------------------------------------------------------------------------------------|---------------------|----------|
| p38 MAPK Signaling                                                 | ASK1/MAP3K5, MYC               | -                                                                                                                                                                                                                       |                     | 9.32e-04 |
| HOTAIR Regulatory Pathway                                          | MLL/KMT2A, MYC                 | PRC2, HOXD10, MIR7, SETDB1, STAT3                                                                                                                                                                                       |                     | 1.7e-03  |
| Endoplasmic Reticulum Stress Pathway                               | ASK1/MAP3K5                    | -                                                                                                                                                                                                                       |                     | 8.25e-03 |
| Polyamine Regulation in Colon Cancer                               | MYC                            | TCF4-CTNN $\beta$                                                                                                                                                                                                       |                     | 9.04e-03 |
| Molecular Mechanisms of Cancer                                     | ASK1/MAP3K5, MYC               | Smad2/3-Smad4                                                                                                                                                                                                           |                     | 1.02e-02 |
| Estrogen-mediated S-phase Entry                                    | MYC                            | -                                                                                                                                                                                                                       |                     | 1.02e-02 |
| 4-1BB Signaling in T Lymphocytes                                   | ASK1/MAP3K5                    | -                                                                                                                                                                                                                       |                     | 1.26e-02 |
| Cardiac Hypertrophy Signaling (Enhanced)                           | ASK1/MAP3K5, MYC               | -                                                                                                                                                                                                                       |                     | 1.54e-02 |
| BAG2 Signaling Pathway                                             | MYC                            | -                                                                                                                                                                                                                       |                     | 1.68e-02 |
| Myc Mediated Apoptosis Signaling                                   | MYC                            | -                                                                                                                                                                                                                       |                     | 1.96e-02 |
| CD27 Signaling in Lymphocytes                                      | ASK1/MAP3K5                    | -                                                                                                                                                                                                                       |                     | 2.07e-02 |
| Unfolded protein response                                          | ASK1/MAP3K5                    | -                                                                                                                                                                                                                       |                     | 2.19e-02 |
| Endometrial Cancer Signaling                                       | MYC                            | -                                                                                                                                                                                                                       |                     | 2.34e-02 |
| Induction of Apoptosis by HIV1                                     | ASK1/MAP3K5                    | -                                                                                                                                                                                                                       |                     | 2.38e-02 |
| Thrombopoietin Signaling                                           | MYC                            | -                                                                                                                                                                                                                       |                     | 2.46e-02 |
| ErbB2-ErbB3 Signaling                                              | MYC                            | -                                                                                                                                                                                                                       |                     | 2.54e-02 |
| Cell Cycle: G1/S Checkpoint Regulation                             | MYC                            | -                                                                                                                                                                                                                       |                     | 2.61e-02 |
| Small Cell Lung Cancer Signaling                                   | MYC                            | -                                                                                                                                                                                                                       |                     | 2.77e-02 |
| ERK5 Signaling                                                     | MYC                            | -                                                                                                                                                                                                                       |                     | 2.8e-02  |
| IL-15 Signaling                                                    | MYC                            | STAT5                                                                                                                                                                                                                   |                     | 2.92e-02 |
| Role of MAPK Signaling in Inhibiting the Pathogenesis of Influenza | ASK1/MAP3K5                    | -                                                                                                                                                                                                                       |                     | 2.92e-02 |
| Neurotrophin/TRK Signaling                                         | ASK1/MAP3K5                    | -                                                                                                                                                                                                                       |                     | 2.96e-02 |
| IL-7 Signaling Pathway                                             | MYC                            | -                                                                                                                                                                                                                       |                     | 3.04e-02 |
| Thyroid Cancer Signaling                                           | MYC                            | TCF/LEF                                                                                                                                                                                                                 |                     | 3.07e-02 |
| Role of MAPK Signaling in the Pathogenesis of Influenza            | ASK1/MAP3K5                    | -                                                                                                                                                                                                                       |                     | 3.11e-02 |
| Prolactin Signaling                                                | MYC                            | -                                                                                                                                                                                                                       |                     | 3.15e-02 |
| LPS-stimulated MAPK Signaling                                      | ASK1/MAP3K5                    | -                                                                                                                                                                                                                       |                     | 3.23e-02 |
| FGF Signaling                                                      | ASK1/MAP3K5                    | -                                                                                                                                                                                                                       |                     | 3.27e-02 |
| PDGF Signaling                                                     | MYC                            | -                                                                                                                                                                                                                       |                     | 3.34e-02 |
| Acute Myeloid Leukemia Signaling                                   | MYC                            | TCF/LEF                                                                                                                                                                                                                 |                     | 3.46e-02 |
| RAK Signaling in Osteoclasts                                       | ASK1/MAP3K5                    | -                                                                                                                                                                                                                       |                     | 3.46e-02 |
| Death Receptor Signaling                                           | ASK1/MAP3K5                    | MKK 4/7, JNK1, BCL-2, DIABLO, HtrA2, CYCS, APAF1, Apaf1-Cyts, CASP 9, CASP 7, XIAP, CASP 3, CASP 6, DNA Repair, DFFA, DFFB, DNA fragmentation, Apoptosis, ACIN1, Chromatin condensation, ARHGDIB, ACTIN, Cell shrinkage |                     | 3.57e-02 |
| Bladder Cancer Signaling                                           | MYC                            | MSK1                                                                                                                                                                                                                    |                     | 3.76e-02 |
| Apoptosis Signaling                                                | ASK1/MAP3K5                    | -                                                                                                                                                                                                                       |                     | 3.88e-02 |
| SAPK/JNK Signaling                                                 | ASK1/MAP3K5                    | -                                                                                                                                                                                                                       |                     | 3.95e-02 |
| Chronic Myeloid Leukemia Signaling                                 | MYC                            | -                                                                                                                                                                                                                       |                     | 3.99e-02 |
| Mouse Embryonic Stem Pluripotency                                  | MYC                            | CTNN $\beta$ , STAT3 dimer                                                                                                                                                                                              |                     | 3.99e-02 |
| Sumoylation Pathway                                                | ASK1/MAP3K5                    | -                                                                                                                                                                                                                       |                     | 3.99e-02 |
| Neuregulin Signaling                                               | MYC                            | -                                                                                                                                                                                                                       |                     | 4.07e-02 |
| Telomerase Signaling                                               | MYC                            | -                                                                                                                                                                                                                       |                     | 4.14e-02 |
| Role of MAPK Signaling in Promoting the Pathogenesis of Influenza  | ASK1/MAP3K5                    | -                                                                                                                                                                                                                       |                     | 4.26e-02 |
| Type 1 Diabetes Mellitus Signaling                                 | ASK1/MAP3K5                    | -                                                                                                                                                                                                                       |                     | 4.29e-02 |
| NGF Signaling                                                      | ASK1/MAP3K5                    | -                                                                                                                                                                                                                       |                     | 4.41e-02 |
| HGF Signaling                                                      | ASK1/MAP3K5                    | -                                                                                                                                                                                                                       |                     | 4.64e-02 |
| 14-3-3-mediated Signaling                                          | ASK1/MAP3K5                    | -                                                                                                                                                                                                                       |                     | 4.9e-02  |
| P2Y Purigenic Receptor Signaling Pathway                           | MYC                            | -                                                                                                                                                                                                                       |                     | 4.9e-02  |

Molecular Mechanisms of Cancer pathway

Supplementary Fig. S2

Molecular Mechanisms of Cancer : PC3 cell line\_9 : Expr Fold Change

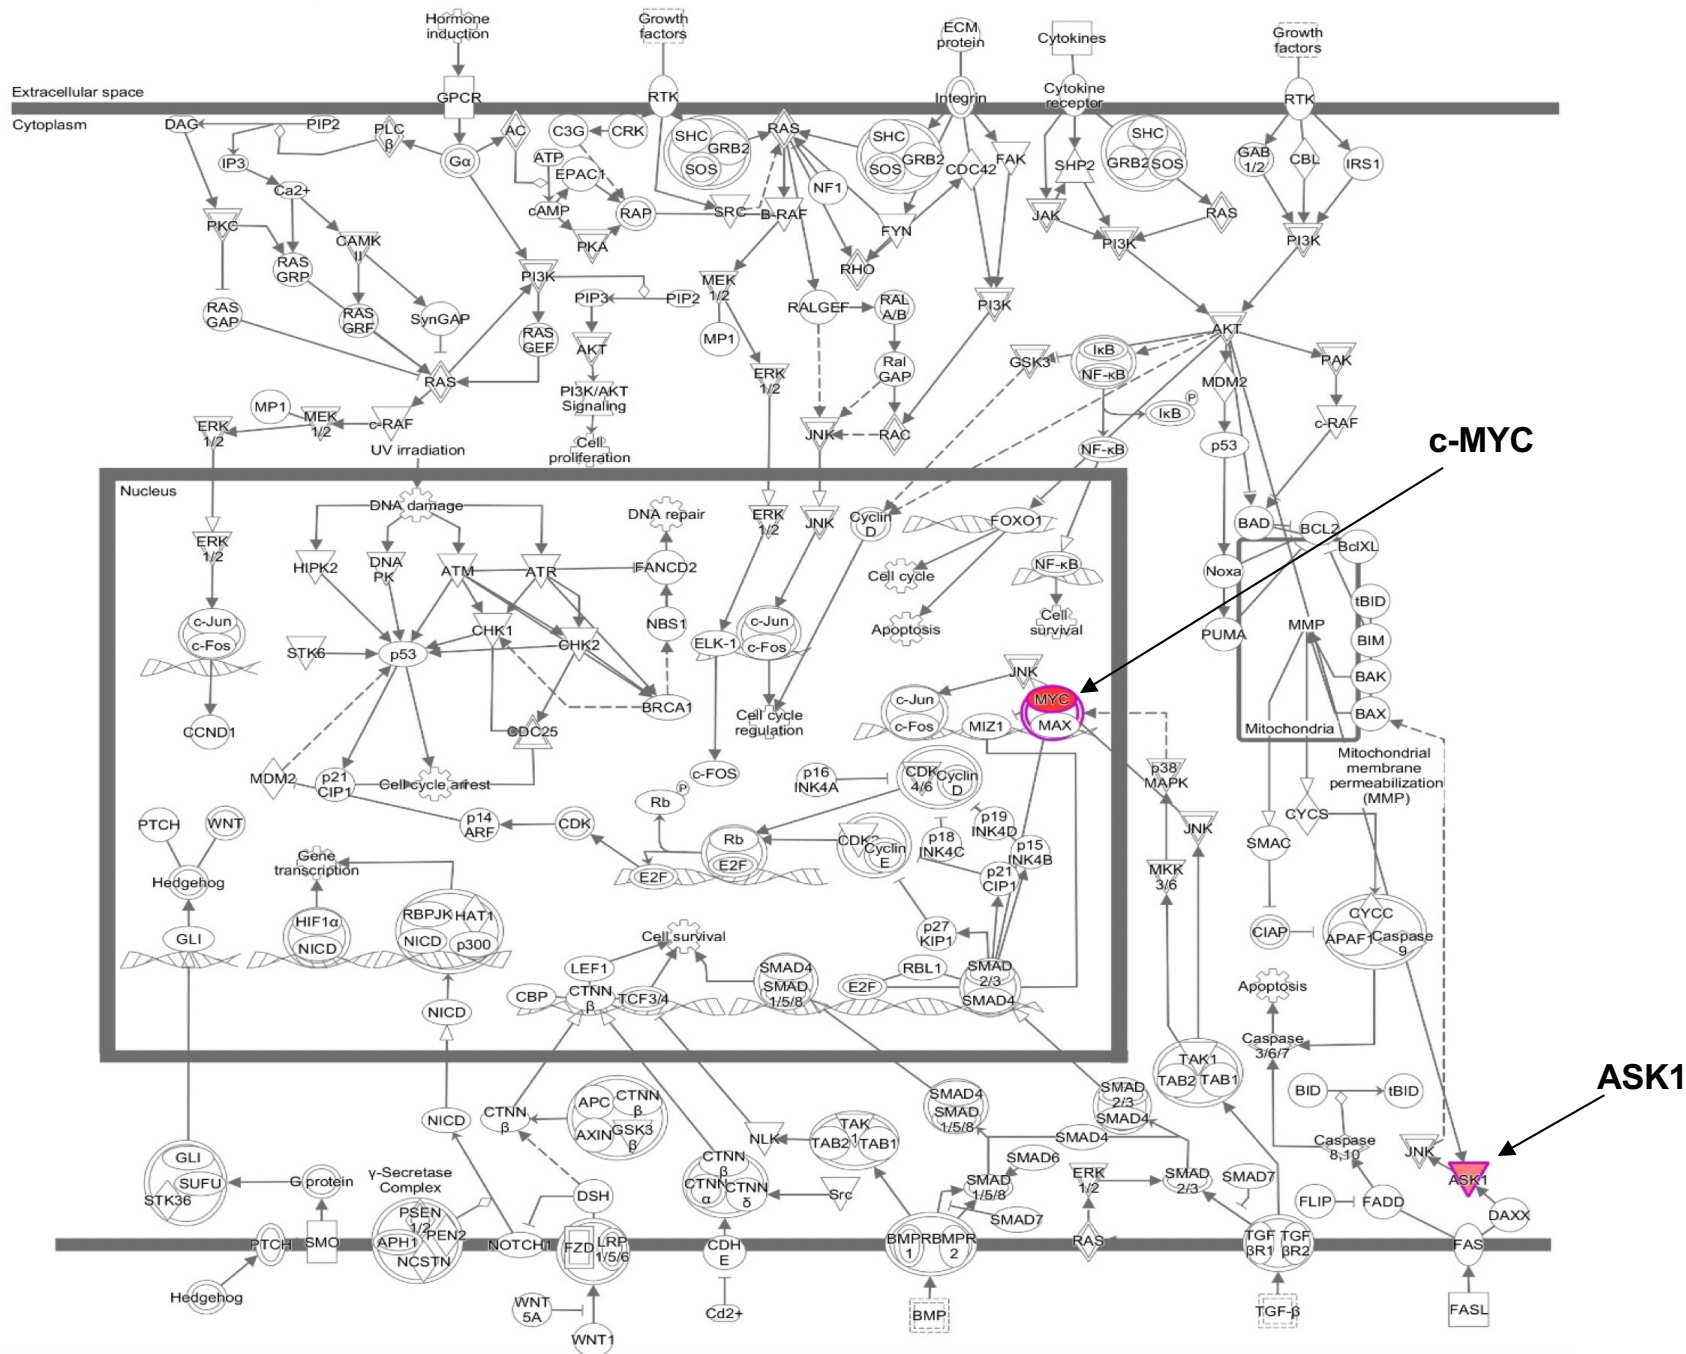

**Supplementary  
Fig. S3**

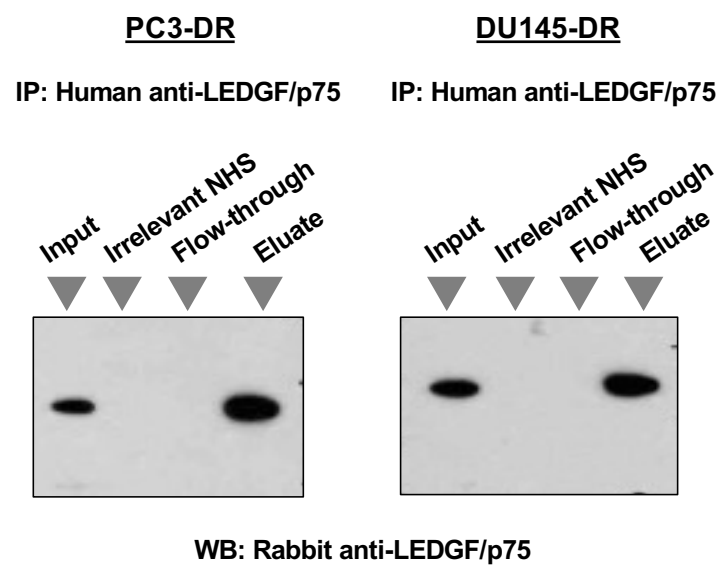



Supplementary  
Fig. S4

DU145-DR

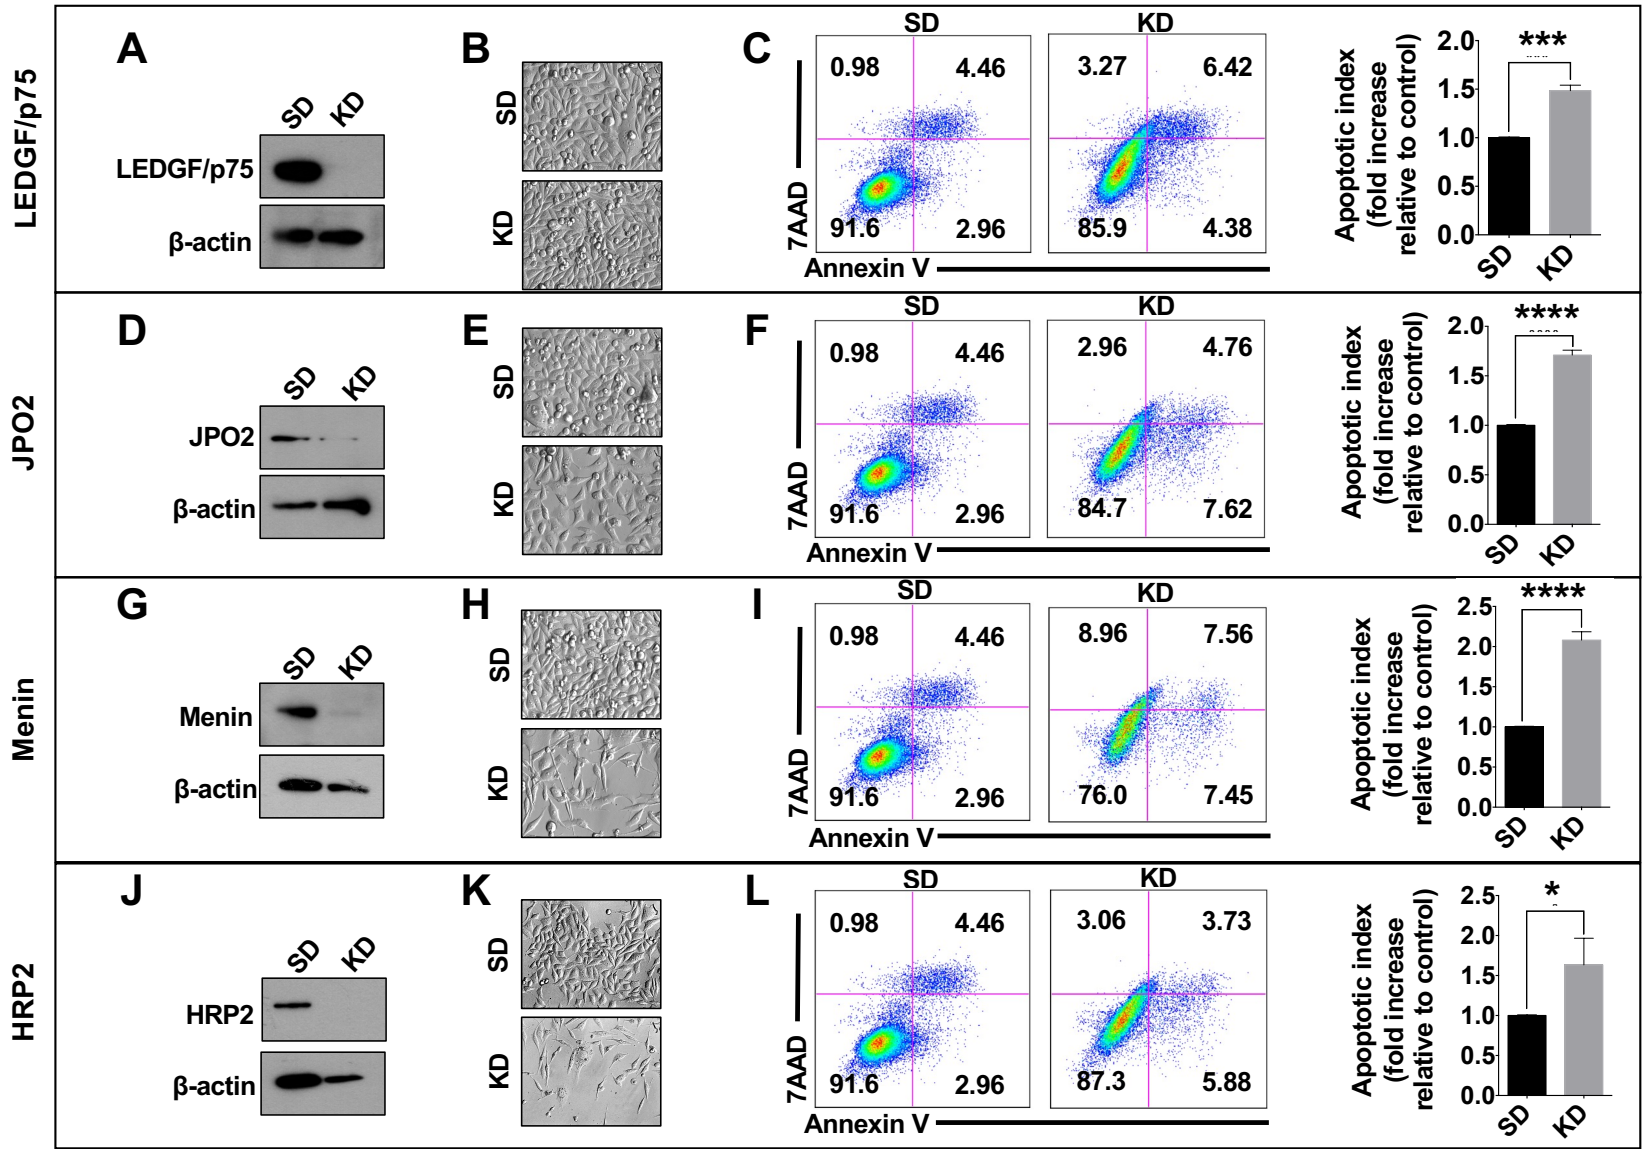

Supplementary  
Fig. S5

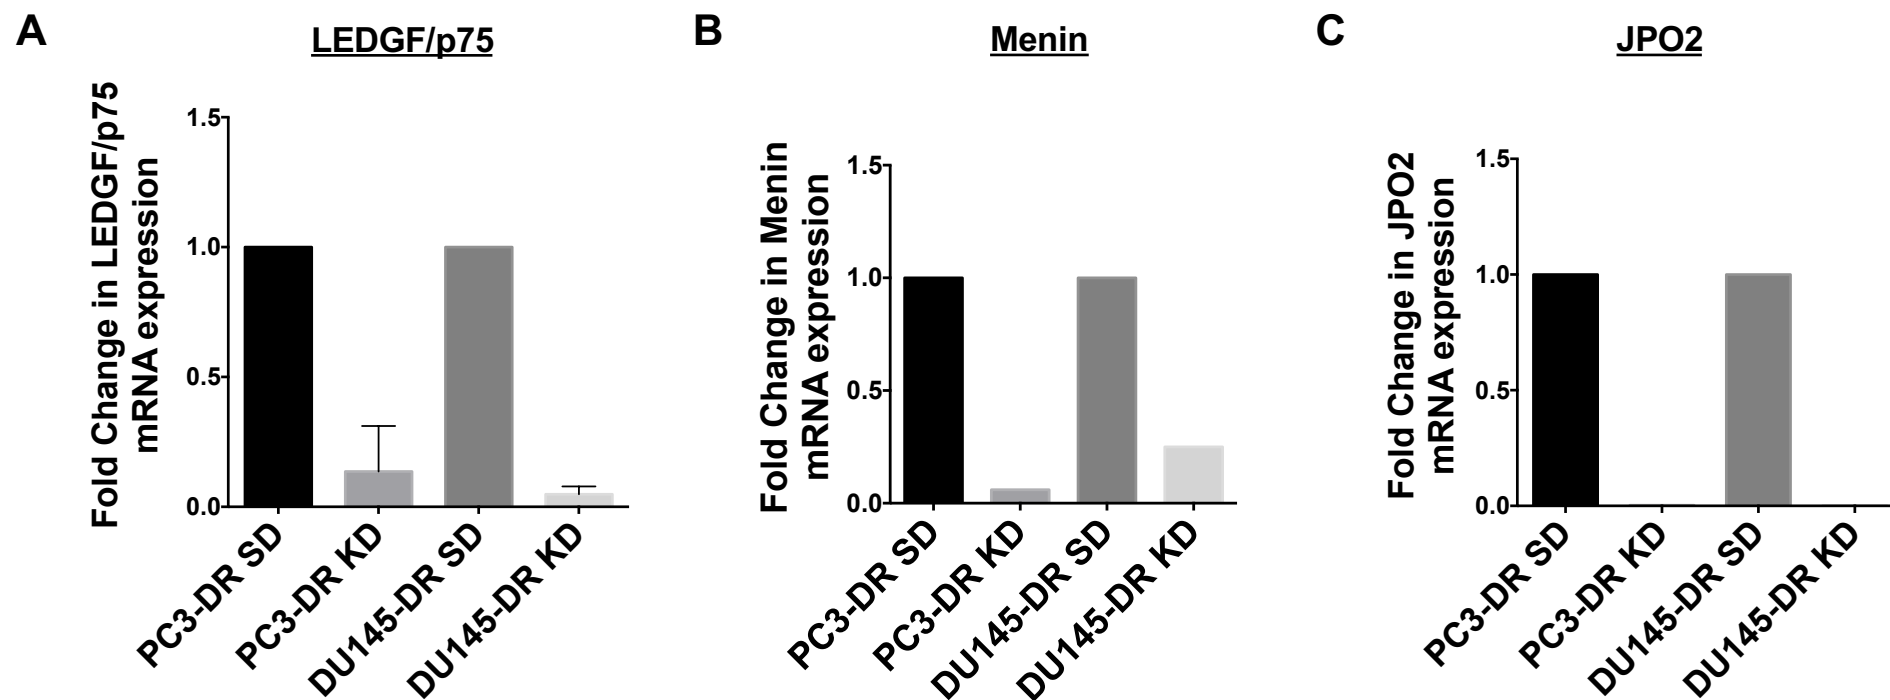

Supplementary  
Fig. S6

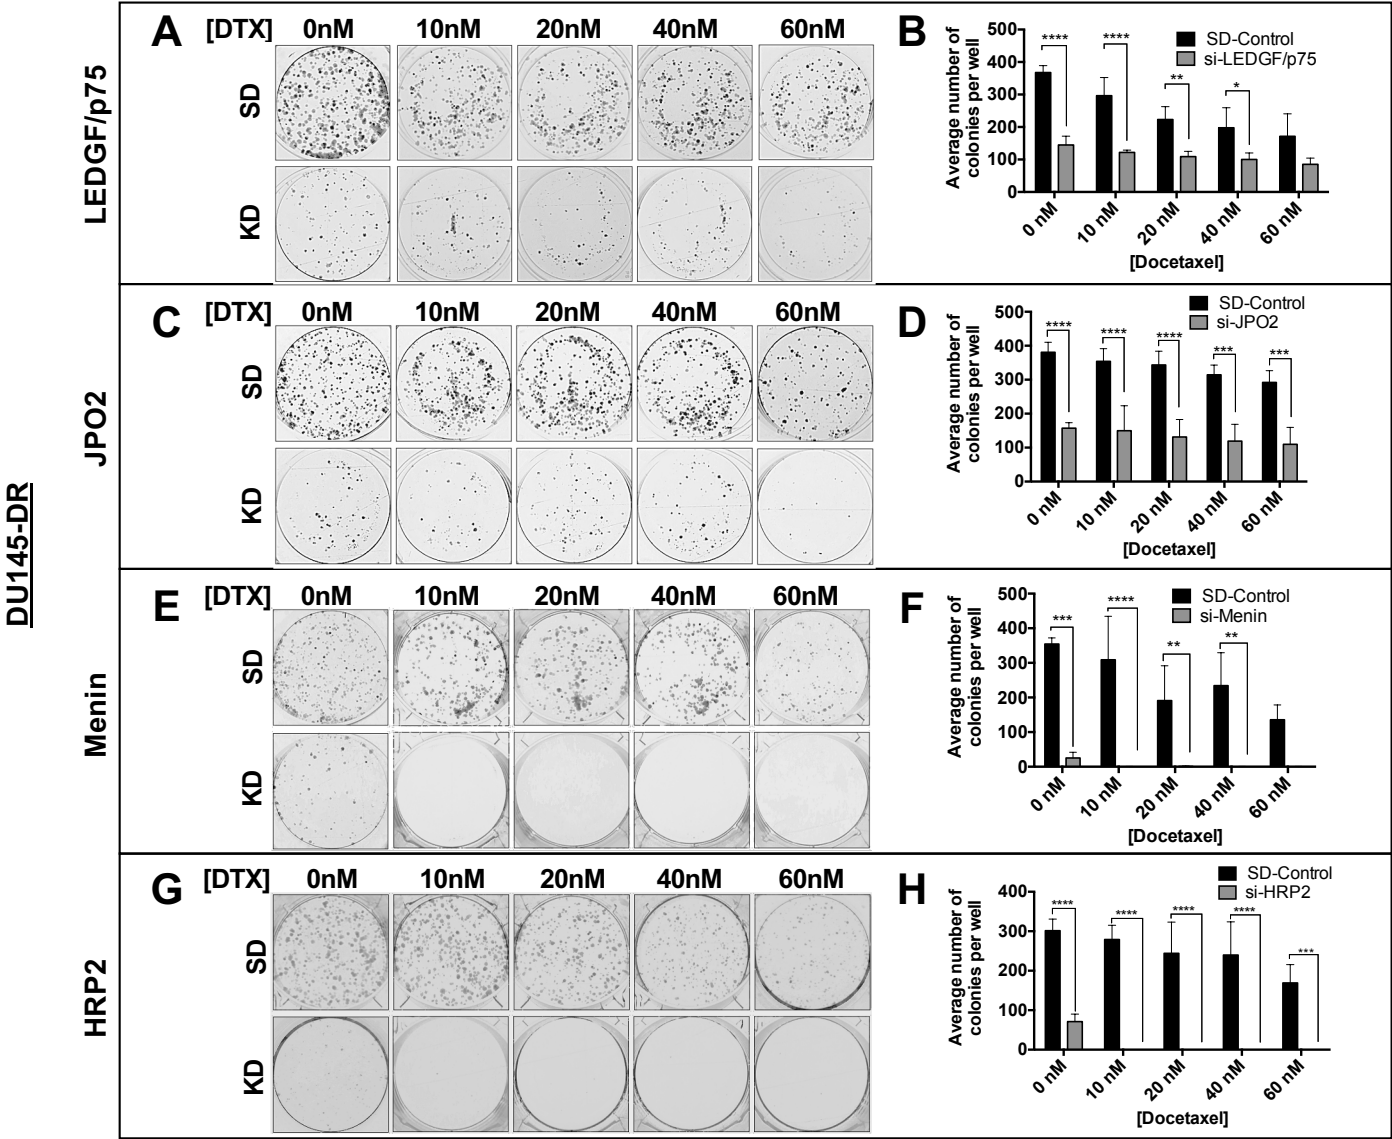

Supplementary  
Fig. S7

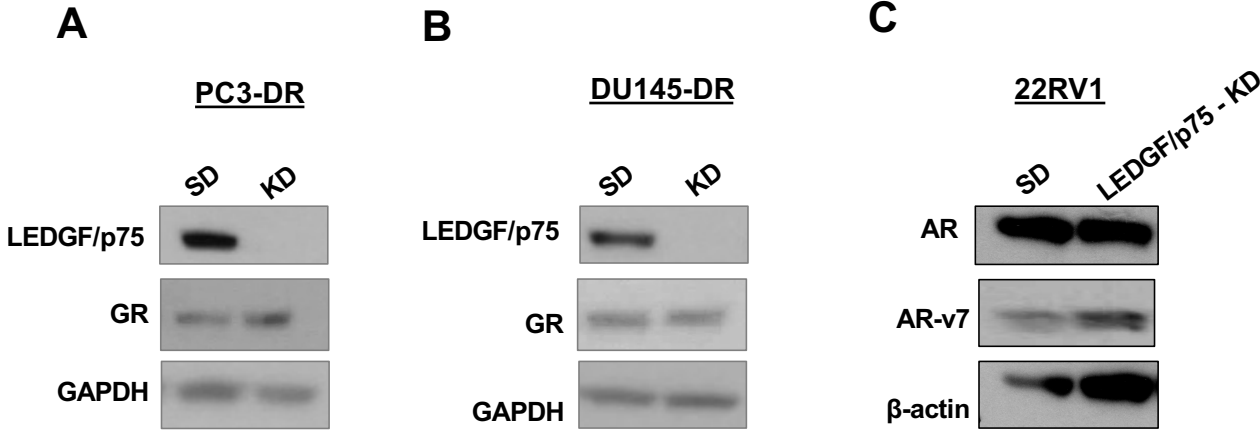

Supplementary  
Fig. S8

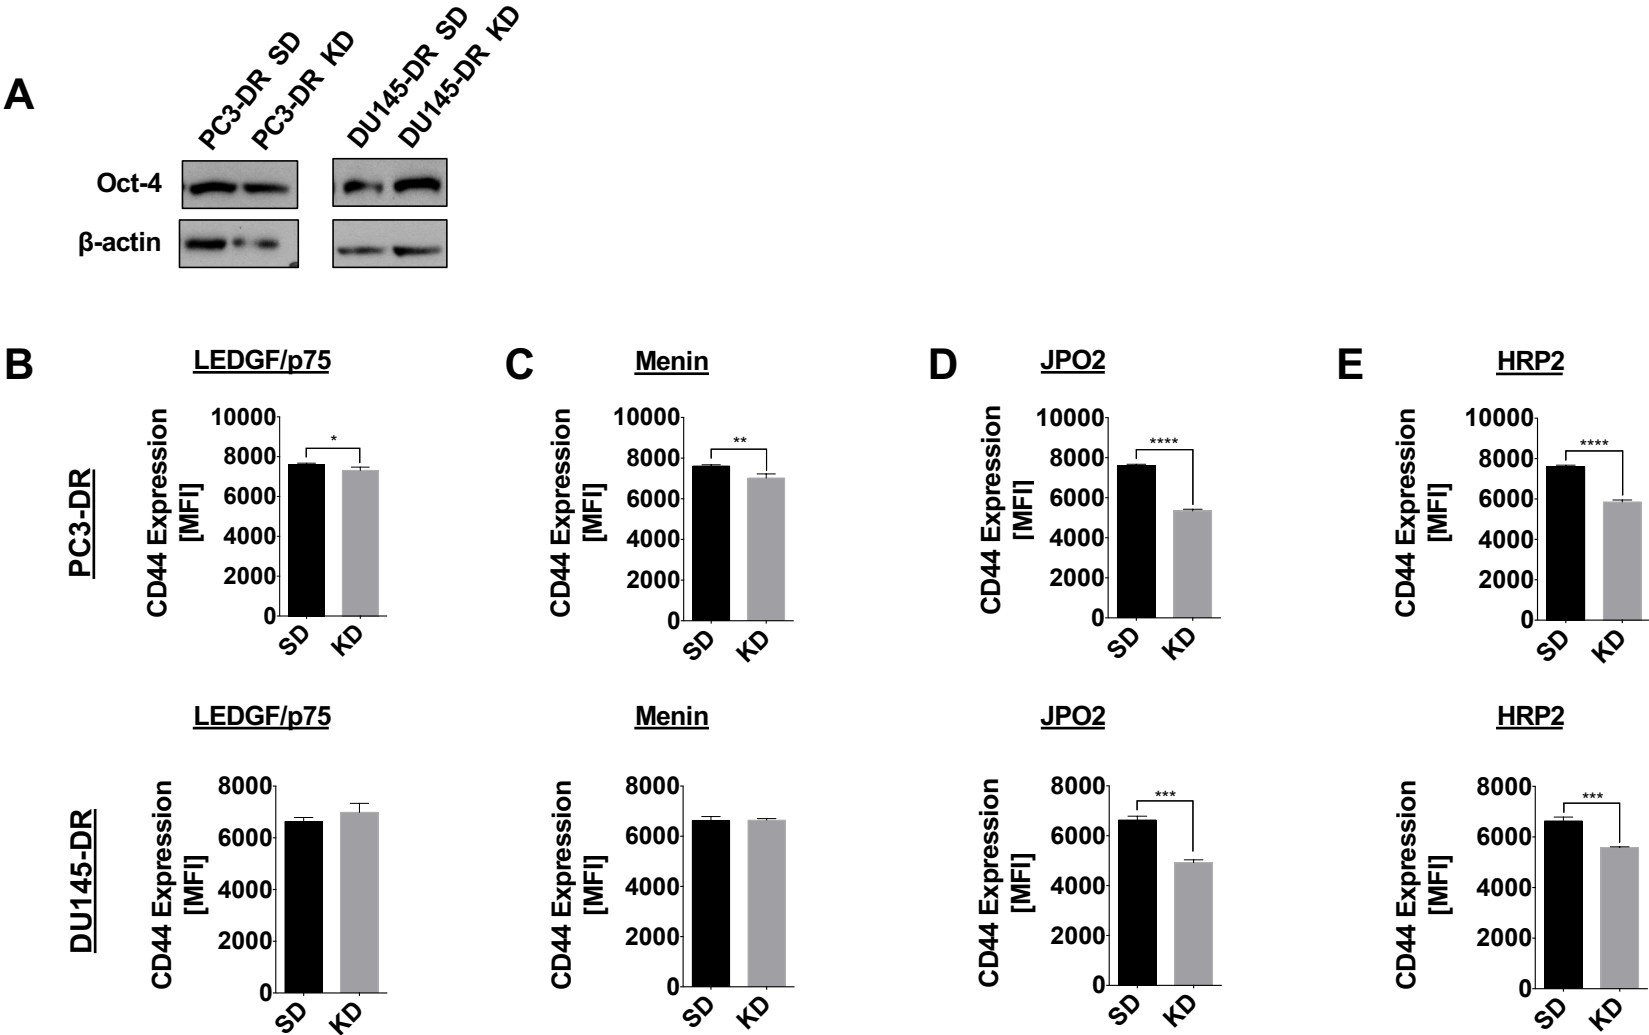

Supplement: s1 [file s1]
